# Supplementary material
Source: PubMed Central journal article supplement (PMC4610872)
Supplement: NIHMS721353-supplement-1.pdf [file NIHMS721353-supplement-1.pdf]

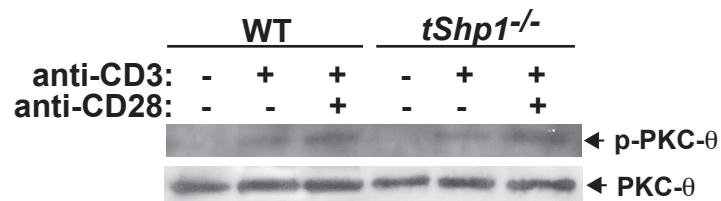

**Supplemental Figure 1. SHP-1 deficiency in T cells does not alter PKC-θ activity.** CD4<sup>+</sup> T cells from *Cd4 Cre* and *tShp1*<sup>-/-</sup> mice were stimulated with anti-CD3 and anti-CD28, and lysed in RIPA buffer. The lysates were blotted with anti-phospho-PKC-θ and anti-PKC-θ, respectively.

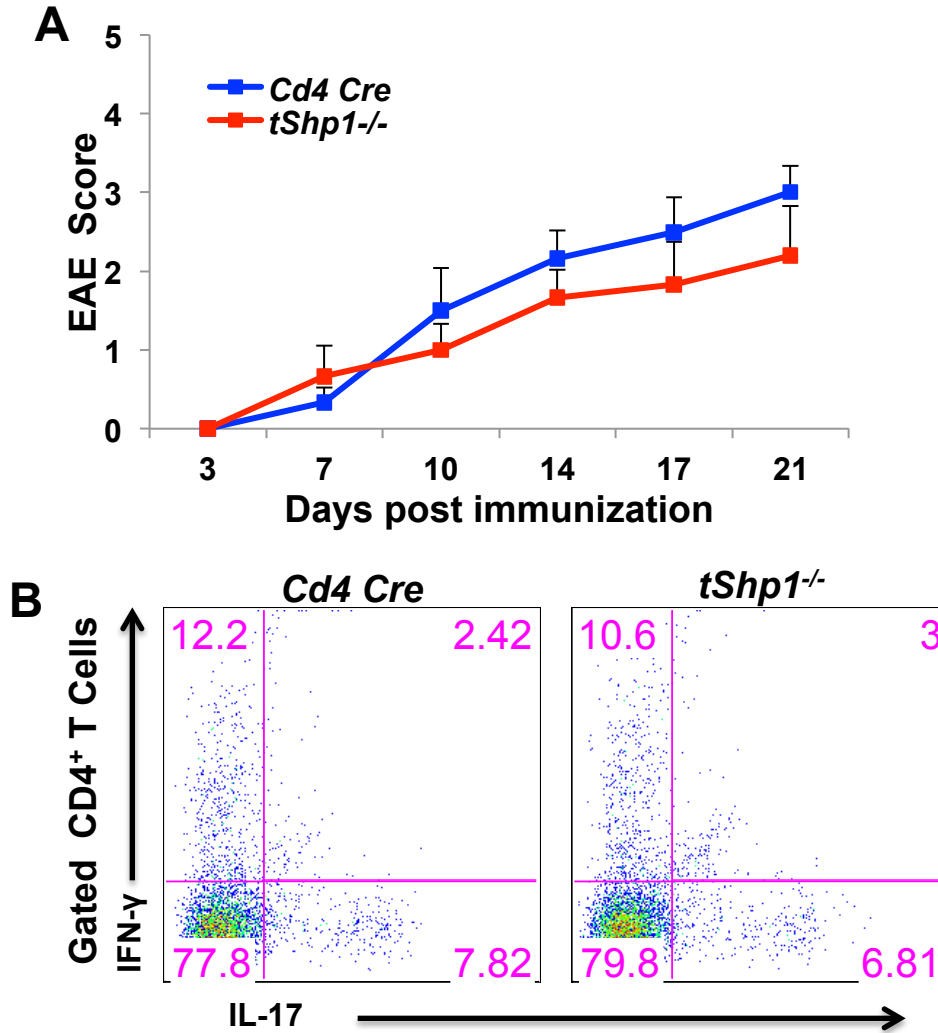

**Supplemental Figure 2. Loss of SHP-1 in T cells does not lead to the development of severe EAE and heightened Th1/17 responses.** *Cd4 Cre* and *tShp1<sup>-/-</sup>* mice (n=5) were immunized with MOG<sub>33-55</sub> in CFA, and the disease severity was monitored (A). The mice were sacrificed at day 21, and the spleen cells were cultured with MOG<sub>33-55</sub> (5 μg/ml) for 48 h, surface-stained with anti-CD4, and intracellularly stained with anti-IFN-γ and anti-IL-17, respectively, and analyzed by flow cytometry (B).

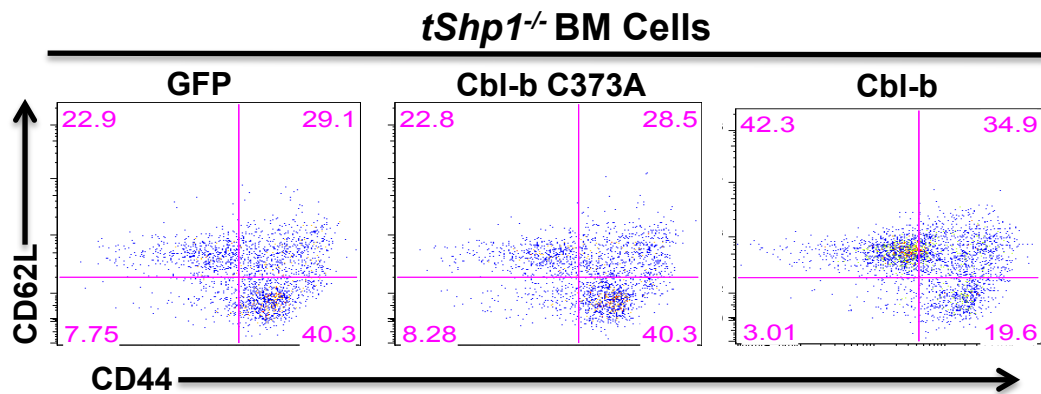

**Supplemental Figure 3. Over-expressing Cbl-b in *tShp1*<sup>-/-</sup> bone-marrow chimeric mice suppresses biased memory T cell phenotype upon OVA/alum immunization.** *tShp1*<sup>-/-</sup> bone-marrow chimeric mice over-expressing Cbl-b or Cbl-b C373A mutant were immunized with OVA in alum and challenged intranasally with OVA in PBS as described in Figure 6B. The mice were sacrificed on day 24. The spleen cells were surface-stained with anti-CD4, anti-CD44, and anti-CD62L.

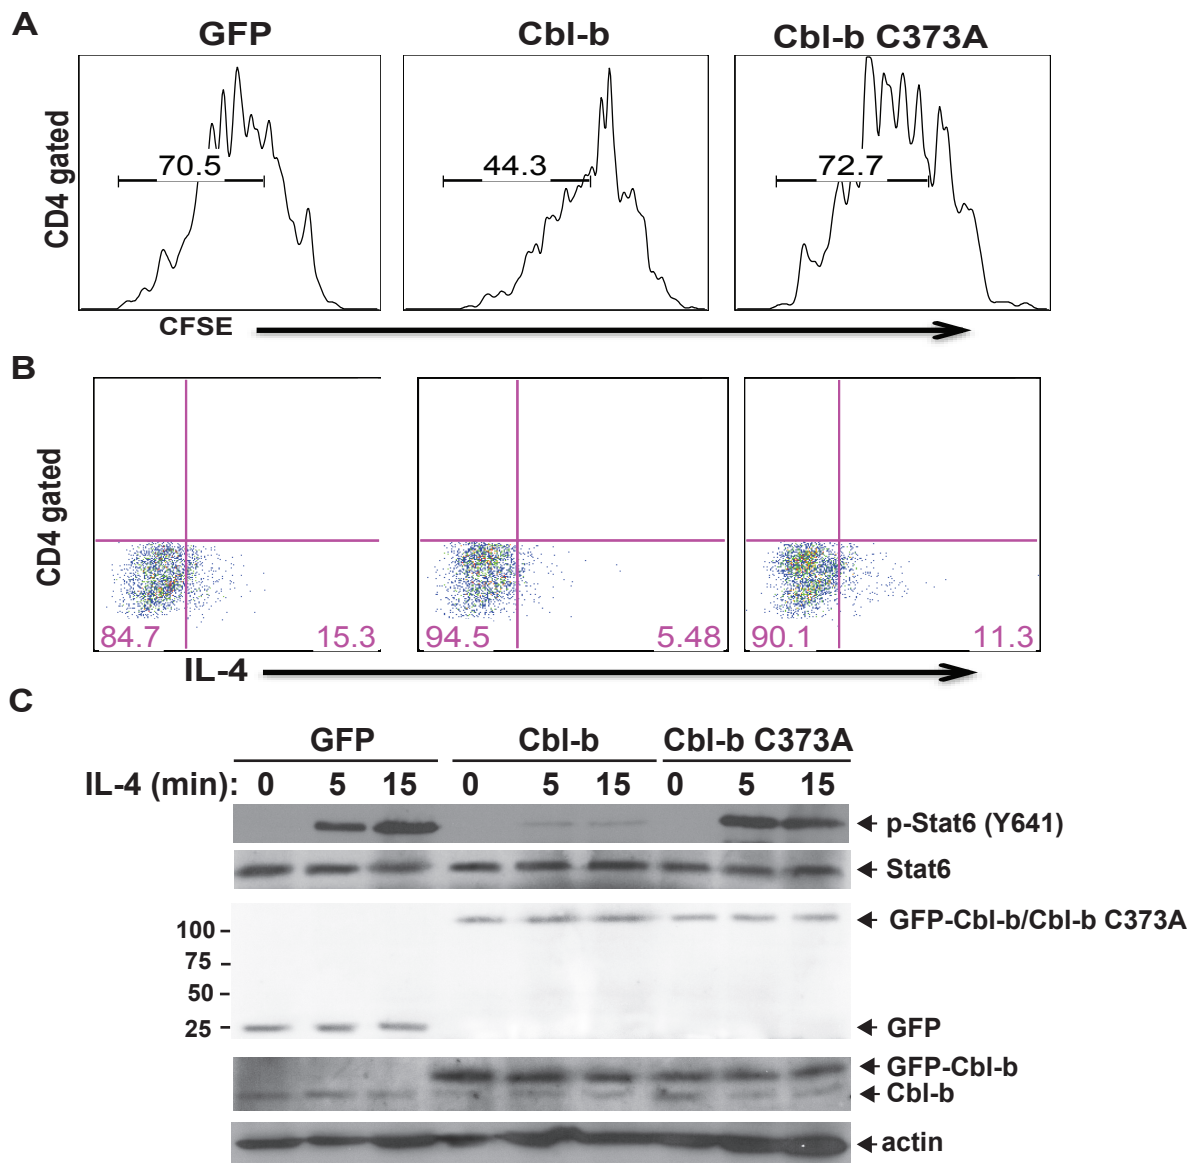

**Supplemental Figure 4. Overexpressing Cbl-b WT T cells inhibits T cell proliferation, Th2 cell differentiation, and IL-4-induced Stat6 phosphorylation.** (A) CD4<sup>+</sup> T cells isolated from WT BM chimeric mice over-expressing Cbl-b or Cbl-b C373A mutant were labeled with CFSE, and stimulated with anti-CD3 and anti-CD28. T cell proliferation was determined by flow cytometry. (B) Naïve CD4<sup>+</sup> T cells isolated from WT BM chimeric mice over-expressing Cbl-b or Cbl-b C373A mutant were cultured under Th2-biased condition (IL-4, anti-IL-12, and anti-IFN- $\gamma$ ). The IL-4-producing CD4<sup>+</sup> T cells were determined. (C) CD4<sup>+</sup> T cells isolated from WT BM chimeric mice over-expressing Cbl-b or Cbl-b C373A mutant were stimulated with IL-4 for 5 and 15 min, and lysed. The cell lysates were immunoblotted with anti-phospho-Stat6 and anti-Stat6, respectively. The membrane was stripped and reprobed with anti-GFP, anti-Cbl-b, and anti-actin, respectively.
